# Supplementary material for: Can surface modification be more effective to enhance the electrochemical performance of lithium rich materials?
Source: Royal Society of Chemistry journal article supplement (doi:10.1039/c1jm14459f), 2011-11-24
Supplement: c1jm14459f.pdf [file c1jm14459f.pdf]

**Supporting Information** for

## Can surface modification be more effective to enhance the electrochemical performance of the lithium rich materials?

Feng Wu,<sup>a,b</sup> Ning Li,<sup>a</sup> Yuefeng Su,<sup>\* a,b</sup> Huaquan Lu,<sup>a</sup> Linjing Zhang,<sup>a</sup> Ran An,<sup>a</sup> Zhao Wang,<sup>a</sup> Liying Bao,<sup>a,b</sup> and Shi Chen<sup>a,b</sup>

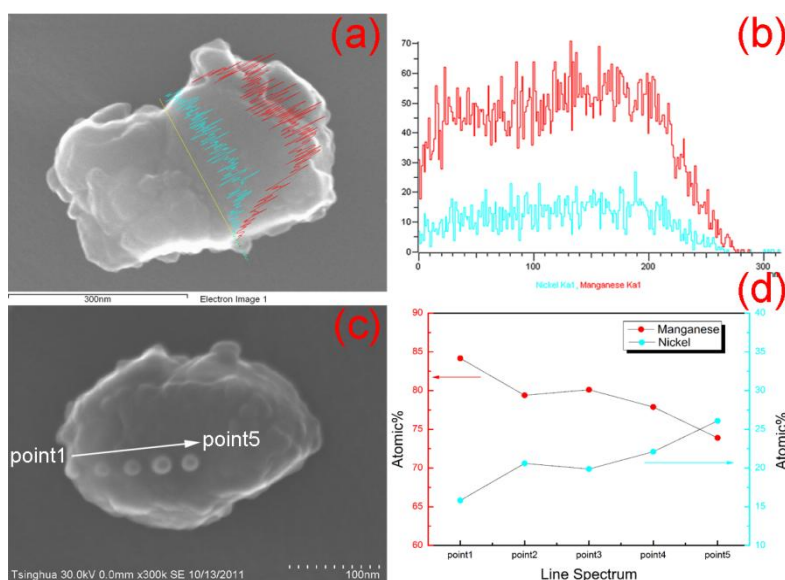

**Figure S11** Energy dispersive X-ray scanning along the projected surface line of TC1 particles. To get accurate EDX data, a thin layer (8-10 nm) of carbon was sprayed on the observed particles for the low electrical conductivity of them. (a) SEM image of a specific particle for line scanning, (b) Mn Kα1 and Ni Kα1 intensity observed during scanning, (c) SEM of a specific particle for line to point scanning, and the gray points were formed after the X-ray scanning on the particle coated by carbon, (d) quantifiable analysis of the atomic% of the Manganese and Nickel elements

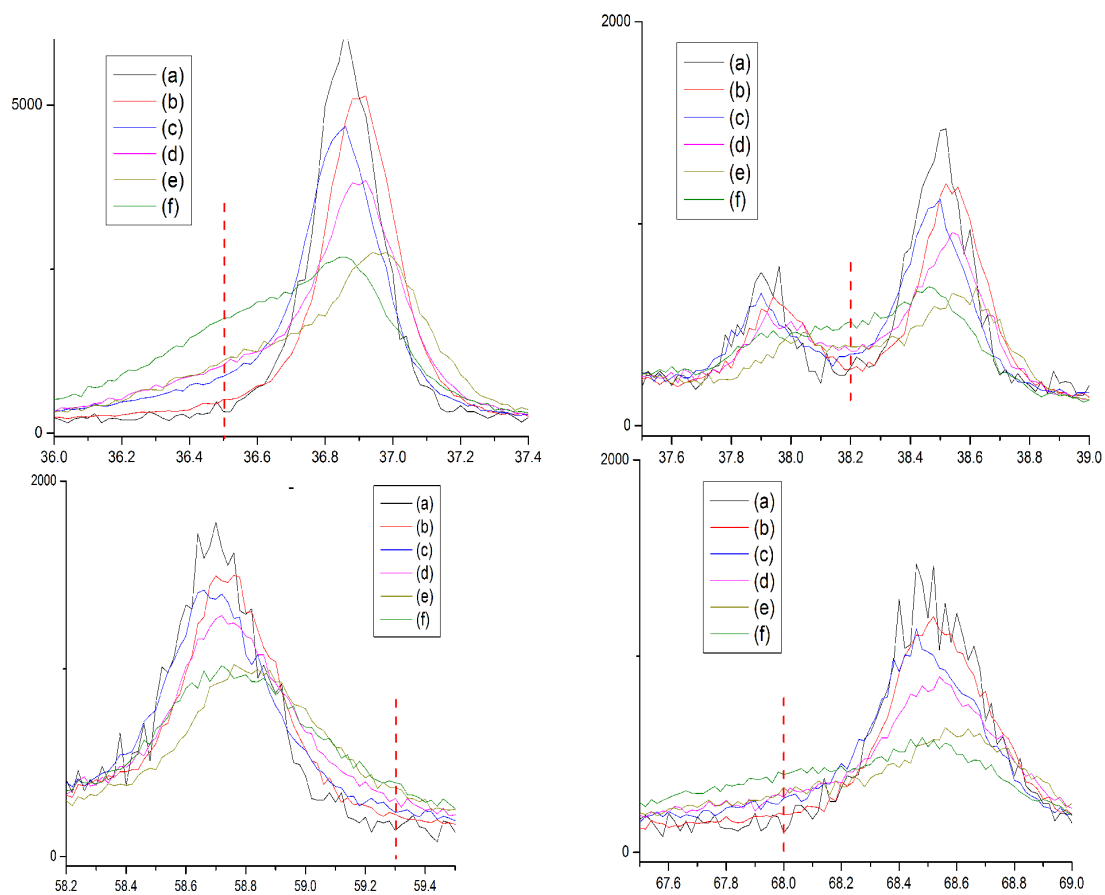

**Figure S12** The enlarged XRD patterns of  $z\text{MnO}_x \cdot (1 - z)\text{Li}[\text{Ni}_{0.2}\text{Li}_{0.2}\text{Mn}_{0.6}]\text{O}_2$  composites: (a) the pristine; (b) CC; (c) TC1; (d) TC2; (e) TC3; (f) TC4.

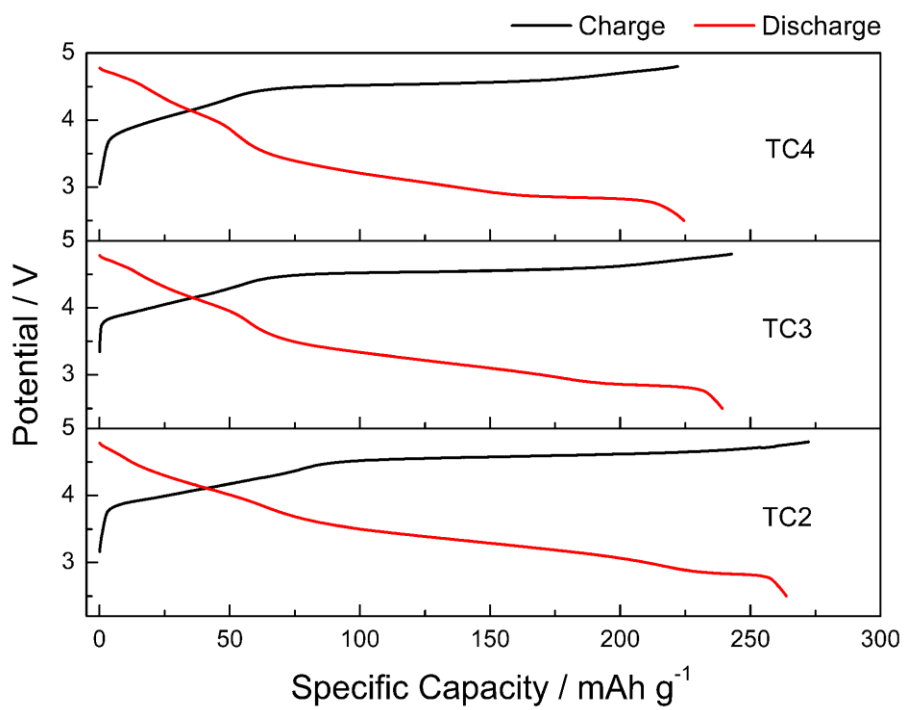

[Figure SI3](#) The initial charge/discharge curves of other thick coated samples.

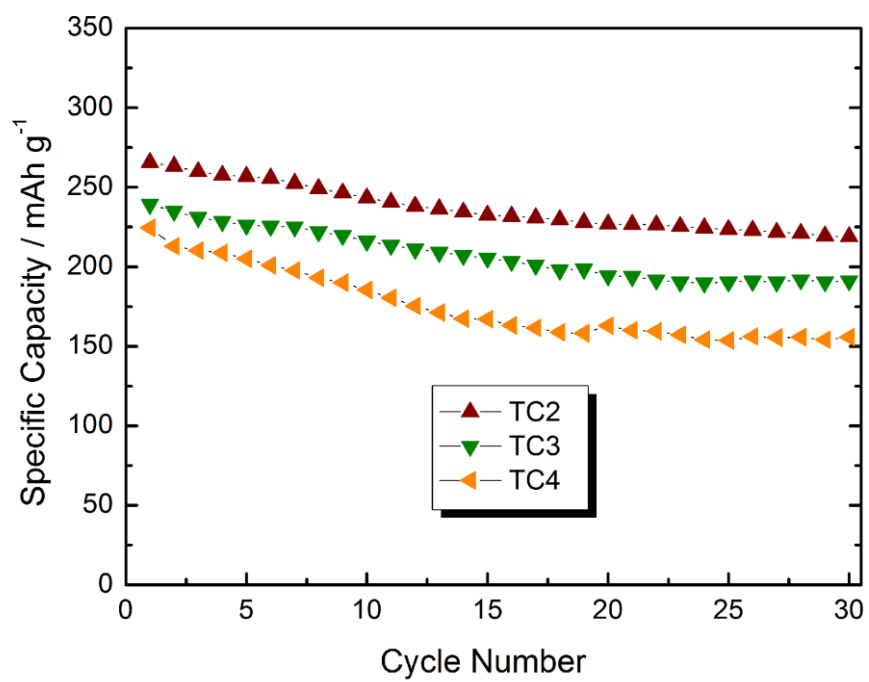

**Figure S14** The cycle performance of the other samples

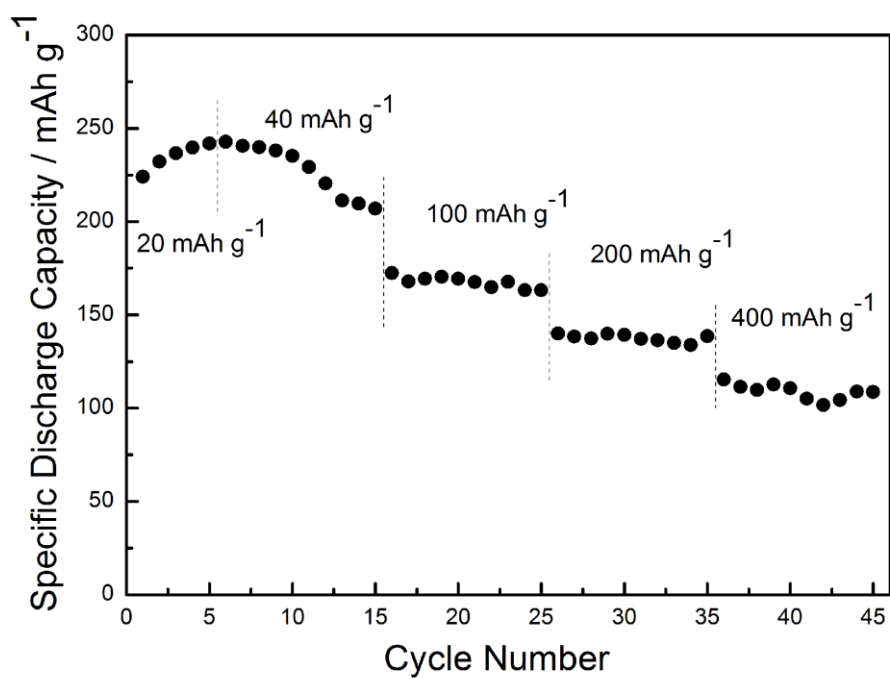

**Figure S15** The rate performance of the pristine sample.

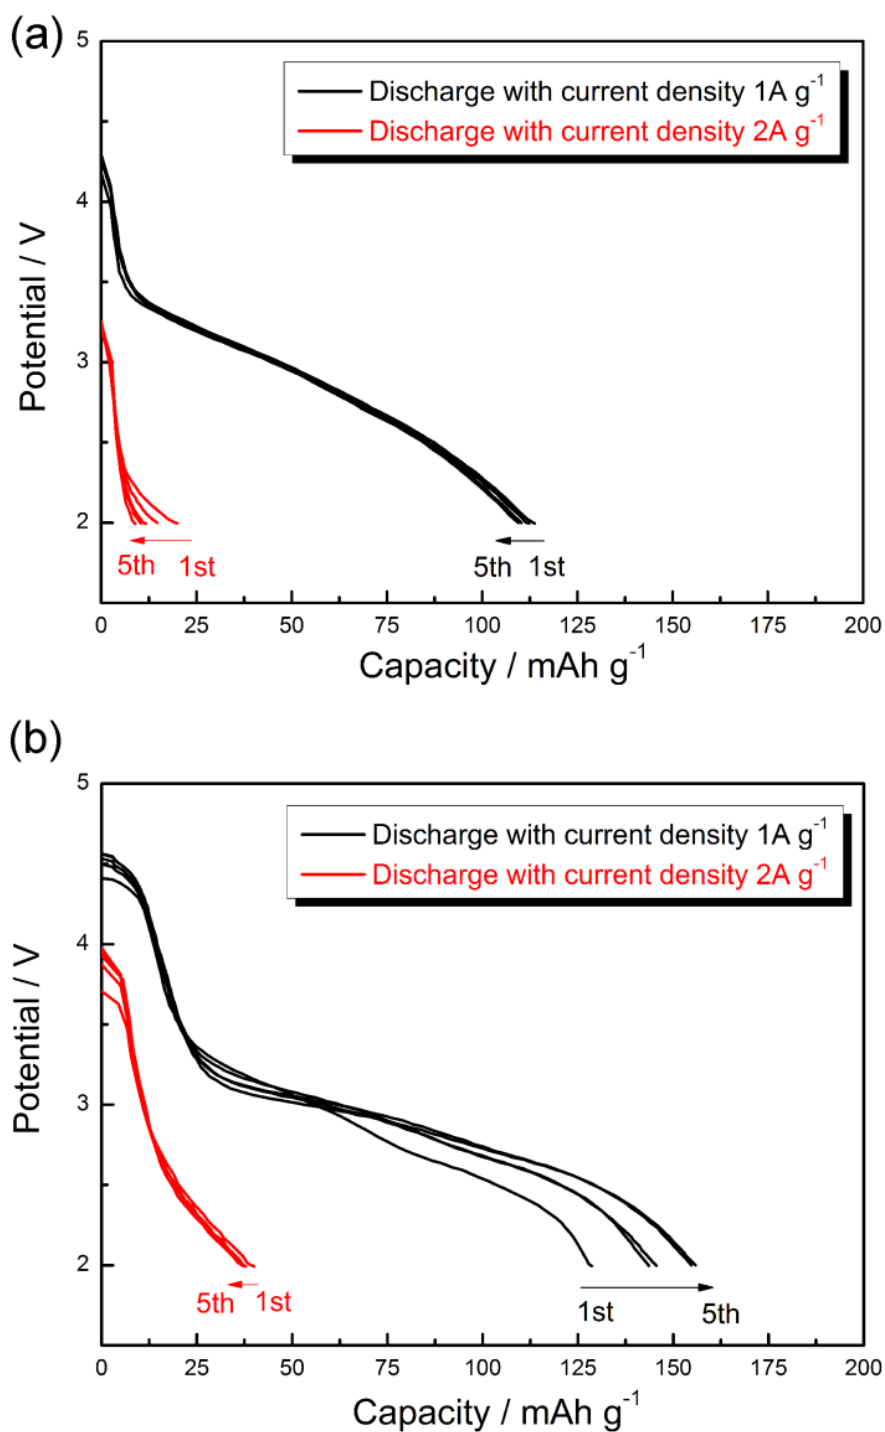

**Figure SI6** The high rate discharge profiles of the modified samples: (a) CC, (b) TC1.

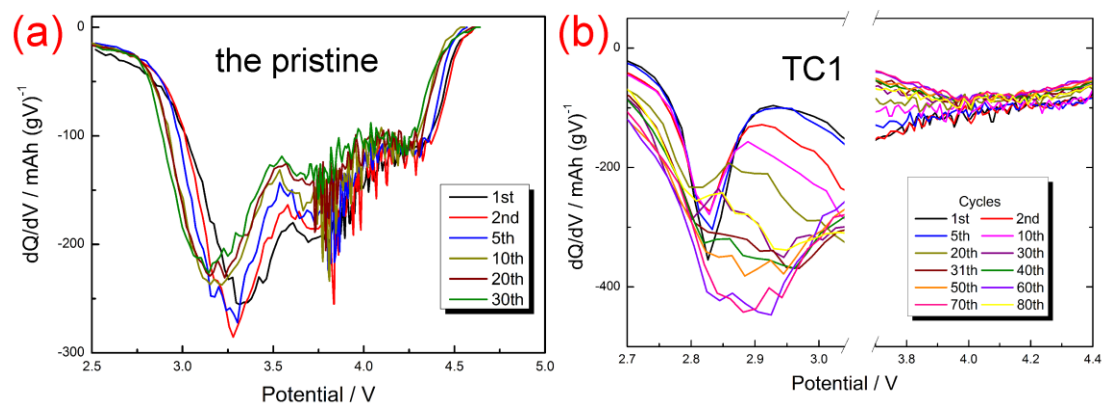

**Figure SI7** The differential capacity versus voltage plots on discharge of samples: (a)  $dQ/dV$  plots of the pristine sample, (b) enlarged  $dQ/dV$  plots of the TC1 sample.
